# Supplementary material
Source: PubMed Central journal article supplement (PMC5881067)
Supplement: AEM.02837-17_zam008188435s1.pdf [file AEM.02837-17_zam008188435s1.pdf]

## Supplementary Material

a

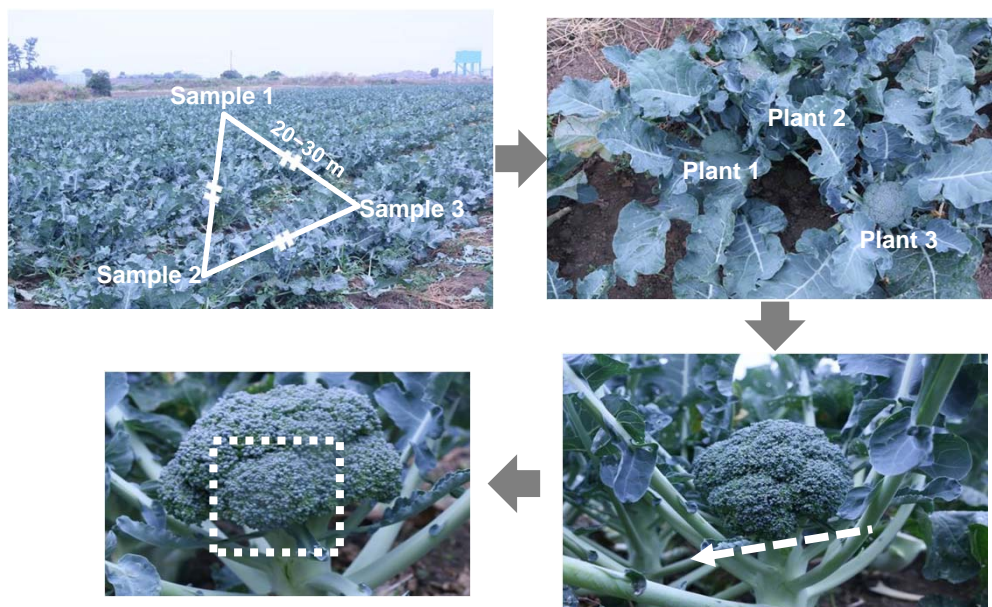

b

| Region          | Sub-region | Farm | Sample ID  | Latitude, Longitude        | Sampling date | Host growth <sup>1</sup> | Host health <sup>2</sup> |
|-----------------|------------|------|------------|----------------------------|---------------|--------------------------|--------------------------|
| A<br>(Daejeong) | A1         | F1   | 1, 2, 3    | 33°12'49.4"N 126°16'26.8"E | Nov 1, 2014   | immature                 | healthy                  |
|                 |            | F2   | 4, 5, 6    | 33°14'34.3"N 126°13'33.4"E | Jan 11, 2015  | mature                   | healthy                  |
|                 |            | F3   | 7, 8, 9    | 33°14'34.2"N 126°13'37.1"E | Jan 11, 2015  | mature                   | healthy                  |
|                 | A2         | F4   | 10, 11, 12 | 33°14'34.3"N 126°13'59.0"E | Jan 24, 2015  | mature                   | healthy                  |
|                 |            | F5   | 13, 14, 15 | 33°14'12.3"N 126°14'04.7"E | Jan 24, 2015  | mature                   | healthy                  |
|                 |            | F6   | 16, 17, 18 | 33°13'58.2"N 126°14'41.1"E | Jan 24, 2015  | mature                   | healthy                  |
| B<br>(Hallim)   | B1         | F1   | 19, 20, 21 | 33°24'44.0"N 126°17'57.6"E | Nov 8, 2014   | immature                 | healthy                  |
|                 |            | F2   | 22, 23, 24 | 33°24'43.5"N 126°17'59.2"E | Dec 7, 2014   | mature                   | healthy                  |
|                 |            | F3   | 25, 26, 27 | 33°21'27.8"N 126°16'48.8"E | Feb 8, 2015   | mature                   | healthy                  |
|                 | B2         | F4   | 28, 29, 30 | 33°21'27.1"N 126°16'50.3"E | Feb 8, 2015   | mature                   | healthy                  |
|                 |            | F5   | 31, 32, 33 | 33°21'29.3"N 126°16'50.3"E | Feb 8, 2015   | mature                   | healthy                  |
| C<br>(Jocheon)  | C1         | F1   | 34, 35, 36 | 33°31'50.4"N 126°37'20.3"E | Dec 3, 2014   | immature                 | damaged                  |
|                 |            | F2   | 37, 38, 39 | 33°31'49.7"N 126°37'18.5"E | Jan 8, 2015   | mature                   | damaged                  |
|                 |            | F3   | 40, 41, 42 | 33°32'11.5"N 126°37'30.5"E | Jan 22, 2015  | mature                   | damaged                  |
|                 |            | F4   | 43, 44, 45 | 33°32'11.5"N 126°37'29.9"E | Jan 22, 2015  | mature                   | damaged                  |
|                 | C2         | F5   | 46, 47, 48 | 33°31'16.6"N 126°36'23.9"E | Jan 22, 2015  | mature                   | damaged                  |
| D<br>(Seongsan) | D1         | F1   | 49, 50, 51 | 33°26'11.1"N 126°55'01.8"E | Nov 17, 2014  | immature                 | healthy                  |
|                 |            | F2   | 52, 53, 54 | 33°26'21.4"N 126°54'33.0"E | Dec 6, 2014   | mature                   | healthy                  |
|                 |            | F3   | 55, 56, 57 | 33°25'25.1"N 126°53'46.9"E | Dec 29, 2014  | mature                   | healthy                  |
|                 | D2         | F4   | 58, 59, 60 | 33°25'31.1"N 126°54'03.0"E | Dec 29, 2014  | mature                   | healthy                  |
|                 |            | F5   | 61, 62, 63 | 33°24'13.8"N 126°53'07.5"E | Dec 29, 2014  | mature                   | healthy                  |
|                 |            | F6   | 64, 65, 66 | 33°24'15.4"N 126°53'07.3"E | Dec 29, 2014  | mature                   | healthy                  |

<sup>1</sup>The immature and mature plants were collected in 8-9 weeks and 15-16 weeks after seeding, respectively.

<sup>2</sup>Broccoli crops were damaged by black rot and downy mildew before sampling.

**Fig. S1.** The images of the farms, broccoli plants and their flower heads (a), and sampling locations (b) are shown.

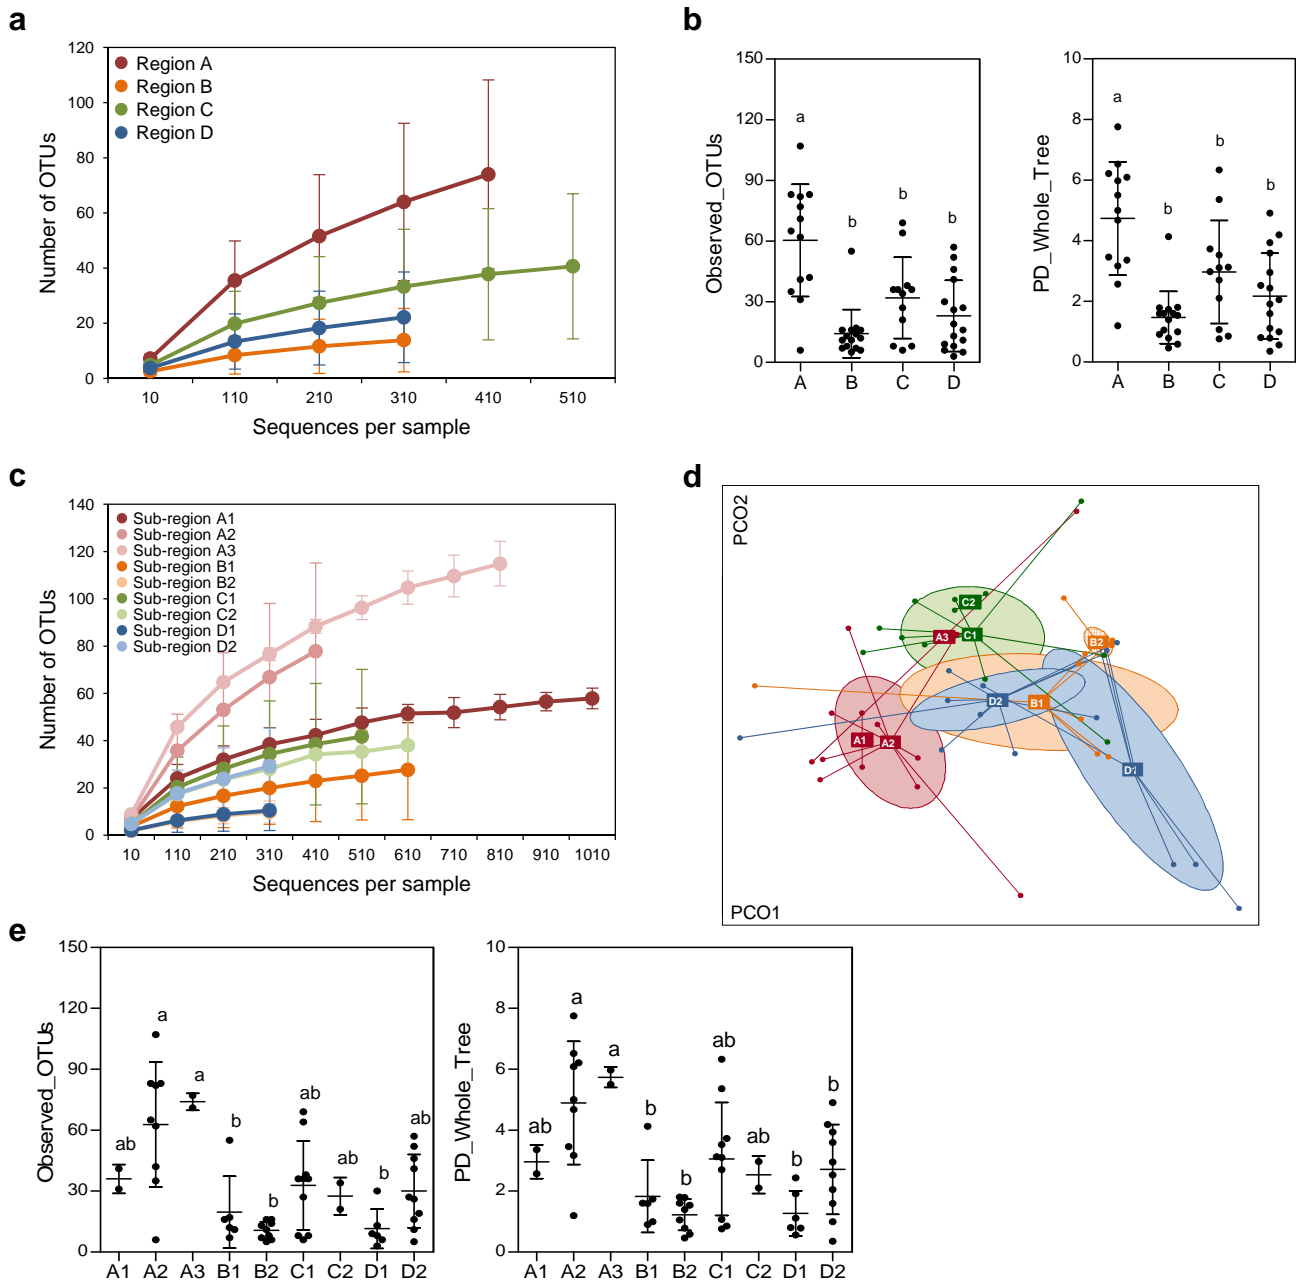

**Fig. S2. Rarefaction curves and sub-region variation in the bacterial communities.** (a) Rarefaction curves of bacterial OTUs in the four regions were shown. (b) Bacterial community diversity of the four regions was compared on the basis of weighted UniFrac distance. (c) Rarefaction curves of bacterial OTUs in the nine sub-regions were shown. Bacterial community composition (d) and diversity (e) of the nine sub-regions were compared using weighted UniFrac distance-based Principal Coordinates Analysis, with 95% confidence ellipses. Statistical significance was evaluated using *Adonis* with 999 permutations and one-way ANOVA with Tukey post-hoc test.

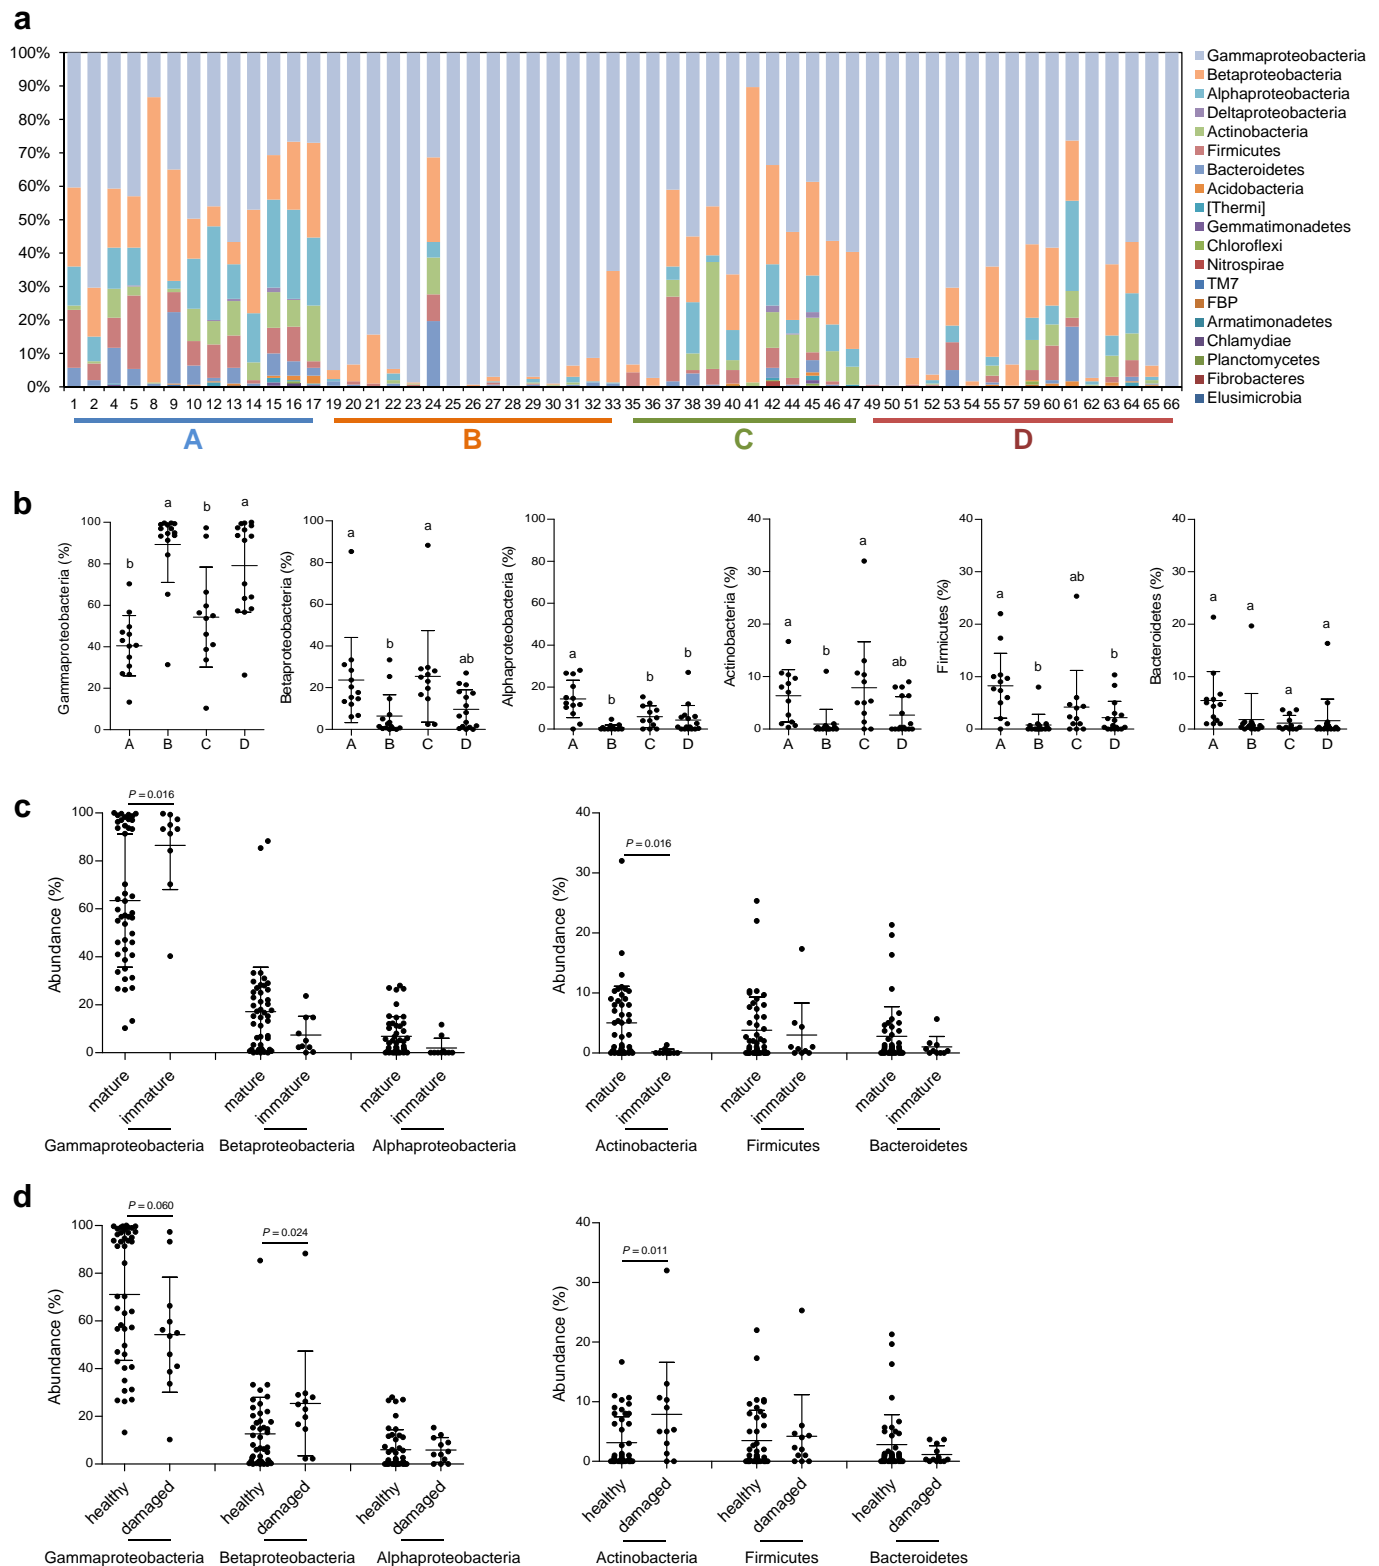

**Fig. S3. Phylum-level comparisons of bacterial communities by farming region, host growth and health.** (a) The relative abundance of 16 phyla detected on broccoli florets were shown in a bar plot. The relative abundance of the phyla *Proteobacteria*, *Actinobacteria*, *Firmicutes* and *Bacteroidetes* were compared by farming region (b), host growth (c) and health (d). Statistical significance was evaluated using one-way ANOVA with Tukey post-hoc test and two-tailed unpaired Student's *t*-test.

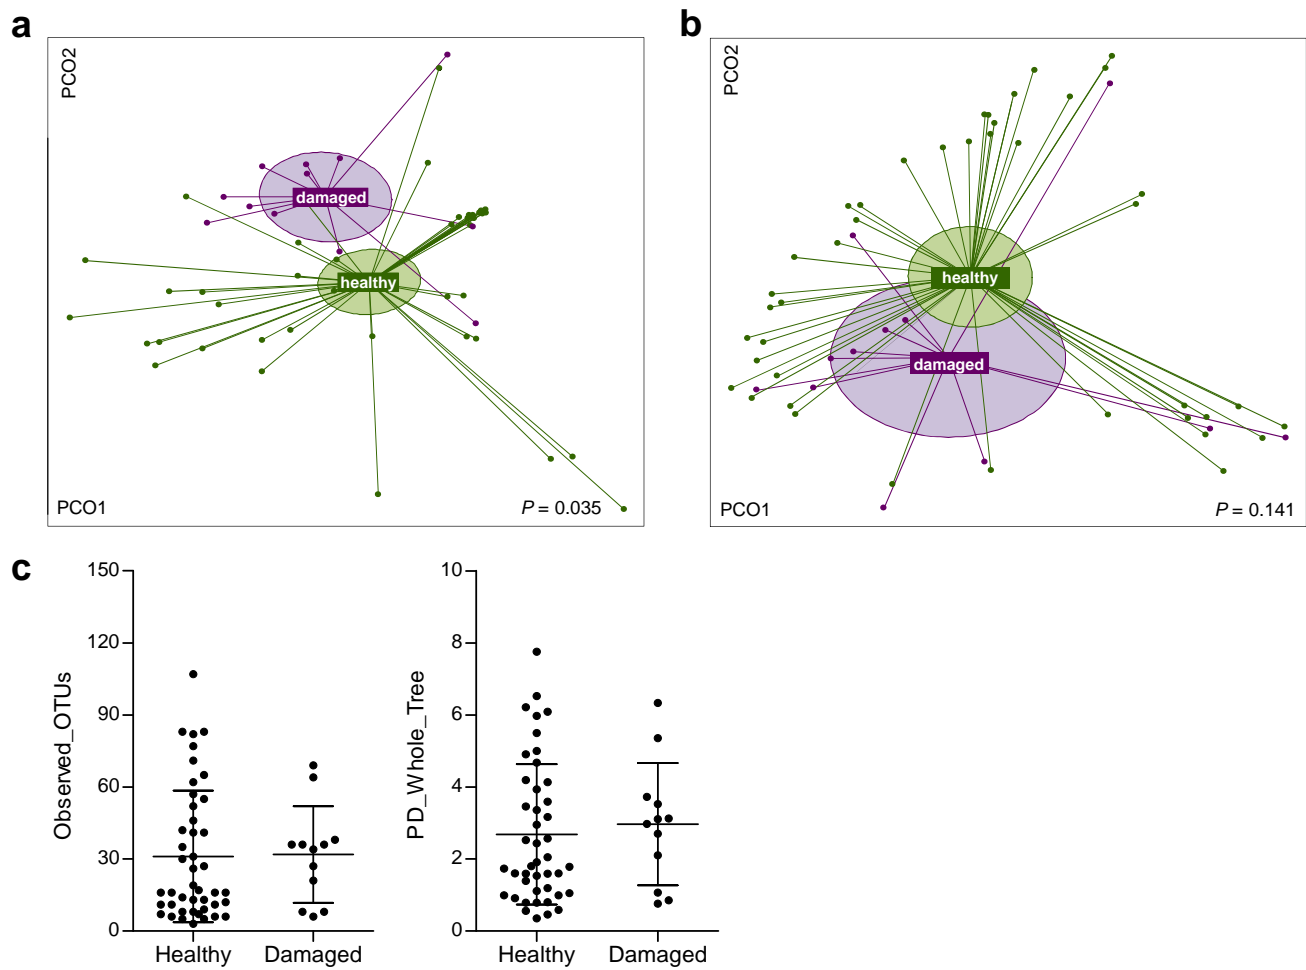

**Fig. S4.** (a) Viable bacteria, *Enterobacteriaceae* and coliform bacteria were estimated using cell culture, and compared by host growth. Bacterial community composition (b) and diversity (c) were compared by host health. All data are mean $\pm$ SD.

**Table S1. Sequence information**

| Region | Sub-region | Sample | #raw reads | #quality-filtered | #chloroplast | #mitochondria | #unassigned | #final reads |       |
|--------|------------|--------|------------|-------------------|--------------|---------------|-------------|--------------|-------|
| A      | A1         | 1      | 1,223      | 1,214             | 1            | 13            | 1           | 1,199        |       |
|        |            | 2      | 4,566      | 4,559             | 0            | 71            | 2           | 4,486        |       |
|        |            | 4      | 3,753      | 3,718             | 1            | 1,560         | 9           | 2,148        |       |
|        |            | 5      | 3,750      | 3,727             | 1            | 1,136         | 9           | 2,581        |       |
|        |            | 8      | 787        | 787               | 0            | 0             | 0           | 787          |       |
|        | 9          | 1,928  | 1,913      | 0                 | 36           | 0             | 1,877       |              |       |
|        | A2         | 10     | 1,840      | 1,834             | 6            | 1,414         | 2           | 412          |       |
|        |            | 11     | 409        | 407               | 0            | 256           | 0           | 151          |       |
|        |            | 12     | 1,614      | 1,583             | 2            | 335           | 5           | 1,241        |       |
|        |            | 13     | 2,001      | 1,955             | 0            | 597           | 11          | 1,347        |       |
|        |            | 14     | 1,799      | 1,781             | 1            | 266           | 4           | 1,510        |       |
|        |            | 15     | 943        | 898               | 0            | 139           | 7           | 752          |       |
|        |            | 16     | 1,006      | 985               | 0            | 111           | 3           | 871          |       |
|        | A3         | 17     | 1,967      | 1,812             | 9            | 120           | 8           | 1,675        |       |
|        | B          | B1     | 19         | 1,575             | 1,575        | 1             | 43          | 0            | 1,531 |
|        |            |        | 20         | 986               | 986          | 0             | 0           | 0            | 986   |
|        |            |        | 21         | 890               | 890          | 0             | 0           | 0            | 890   |
| 22     |            |        | 2,030      | 2,030             | 0            | 0             | 0           | 2,030        |       |
| 23     |            |        | 2,028      | 2,027             | 0            | 3             | 0           | 2,024        |       |
| 24     |            |        | 714        | 708               | 0            | 41            | 0           | 667          |       |
| 25     |            |        | 1,097      | 1,095             | 0            | 0             | 0           | 1,095        |       |
| B2     |            | 26     | 387        | 387               | 0            | 0             | 0           | 387          |       |
|        |            | 27     | 764        | 763               | 0            | 48            | 0           | 715          |       |
|        |            | 28     | 1,217      | 1,216             | 0            | 0             | 0           | 1,216        |       |
|        |            | 29     | 3,706      | 3,703             | 0            | 2             | 0           | 3,701        |       |
|        |            | 30     | 2,894      | 2,889             | 0            | 0             | 0           | 2,889        |       |
|        |            | 31     | 2,108      | 2,105             | 0            | 0             | 0           | 2,105        |       |
| 32     |            | 2,862  | 2,857      | 0                 | 0            | 2             | 2,855       |              |       |
| 33     |            | 609    | 609        | 0                 | 0            | 0             | 609         |              |       |
| C      |            | C1     | 35         | 790               | 789          | 0             | 2           | 0            | 787   |
|        |            |        | 36         | 937               | 937          | 0             | 1           | 0            | 936   |
|        | 37         |        | 1,613      | 1,606             | 25           | 960           | 0           | 621          |       |
|        | 38         |        | 1,780      | 1,776             | 30           | 1,050         | 0           | 696          |       |
|        | 39         |        | 1,964      | 1,963             | 1            | 158           | 0           | 1,804        |       |
|        | 40         |        | 3,931      | 3,916             | 103          | 2,078         | 0           | 1,735        |       |
|        | 41         |        | 612        | 610               | 0            | 1             | 0           | 609          |       |
|        | 42         |        | 2,984      | 2,959             | 82           | 1,411         | 6           | 1,460        |       |
|        | 44         |        | 1,411      | 1,409             | 52           | 664           | 0           | 693          |       |
|        | 45         |        | 1,378      | 1,352             | 72           | 615           | 3           | 662          |       |
| C2     | 46         | 1,303  | 1,292      | 30                | 625          | 0             | 637         |              |       |
|        | 47         | 1,642  | 1,601      | 44                | 686          | 0             | 871         |              |       |
|        | 49         | 1,011  | 1,011      | 0                 | 0            | 0             | 1,011       |              |       |
| D      | D1         | 50     | 1,000      | 1,000             | 0            | 0             | 0           | 1,000        |       |
|        |            | 51     | 884        | 884               | 0            | 0             | 0           | 884          |       |
|        |            | 52     | 2,776      | 2,772             | 0            | 1             | 0           | 2,771        |       |
|        |            | 53     | 377        | 374               | 0            | 0             | 0           | 374          |       |
|        |            | 54     | 917        | 915               | 0            | 0             | 0           | 915          |       |
|        |            | 55     | 1,471      | 1,466             | 13           | 144           | 0           | 1,309        |       |
|        |            | 57     | 1,479      | 1,478             | 0            | 0             | 0           | 1,478        |       |
|        | D2         | 59     | 1,690      | 1,687             | 55           | 1,004         | 2           | 626          |       |
|        |            | 60     | 1,937      | 1,933             | 78           | 1,291         | 3           | 561          |       |
|        |            | 61     | 539        | 531               | 0            | 214           | 0           | 317          |       |
|        |            | 62     | 657        | 657               | 0            | 3             | 0           | 654          |       |
|        |            | 63     | 1,795      | 1,791             | 29           | 266           | 1           | 1,495        |       |
|        |            | 64     | 1,953      | 1,940             | 15           | 403           | 6           | 1,516        |       |
|        |            | 65     | 1,340      | 1,337             | 0            | 13            | 2           | 1,322        |       |
| 66     | 2,703      | 2,703  | 0          | 0                 | 0            | 2,703         |             |              |       |

**Table S2. Meteorological parameters in the four regions**

| Region | Sub-region | Farm | Temperature (°C) <sup>1,2</sup> | Relative humidity (%) <sup>1,2</sup> | Precipitation (mm) <sup>1,2</sup> | Insolation (hr) <sup>1,2</sup> | Cloud cover <sup>1,2</sup> |
|--------|------------|------|---------------------------------|--------------------------------------|-----------------------------------|--------------------------------|----------------------------|
| A      | A1         | F1   | 16.3±2.1                        | 72.8±10.4                            | 3.5±3.8                           | 6.1±4.7                        | 5.1±3.8                    |
|        |            | F2   | 7.5±2.6                         | 68.4±7.9                             | 4.3±9.6                           | 5.0±3.5                        | 5.7±2.8                    |
|        | A2         | F3   | 7.5±2.6                         | 68.4±7.9                             | 4.3±9.6                           | 5.0±3.5                        | 5.7±2.8                    |
|        |            | F4   | 6.5±2.4                         | 71.4±9.3                             | 2.9±4.9                           | 4.0±3.4                        | 6.8±1.9                    |
|        |            | F5   | 6.5±2.4                         | 71.4±9.3                             | 2.9±4.9                           | 4.0±3.4                        | 6.8±1.9                    |
|        | A3         | F6   | 6.5±2.4                         | 71.4±9.3                             | 2.9±4.9                           | 4.0±3.4                        | 6.8±1.9                    |
| B      | B1         | F1   | 13.9±2.0                        | 64.9±8.9                             | 2.6±3.6                           | 4.1±3.3                        | 5.8±2.6                    |
|        |            | F2   | 8.0±2.6                         | 66.2±7.5                             | 3.4±4.5                           | 1.3±1.9                        | 7.8±1.4                    |
|        | B2         | F3   | 6.3±2.7                         | 60.8±6.7                             | 2.3±5.2                           | 3.7±3.8                        | 5.9±2.9                    |
|        |            | F4   | 6.3±2.7                         | 60.8±6.7                             | 2.3±5.2                           | 3.7±3.8                        | 5.9±2.9                    |
|        |            | F5   | 6.3±2.7                         | 60.8±6.7                             | 2.3±5.2                           | 3.7±3.8                        | 5.9±2.9                    |
| C      | C1         | F1   | 9.8±3.7                         | 70.6±7.7                             | 5.9±7.8                           | 2.0±2.4                        | 7.2±1.9                    |
|        |            | F2   | 7.9±1.8                         | 66.6±8.5                             | 8.2±13.4                          | 3.5±2.8                        | 6.2±2.5                    |
|        |            | F3   | 7.5±1.9                         | 68.9±9.3                             | 4.9±6.7                           | 3.0±2.7                        | 6.8±2.2                    |
|        |            | F4   | 7.5±1.9                         | 68.9±9.3                             | 4.9±6.7                           | 3.0±2.7                        | 6.8±2.2                    |
|        | C2         | F5   | 7.5±1.9                         | 68.9±9.3                             | 4.9±6.7                           | 3.0±2.7                        | 6.8±2.2                    |
| D      | D1         | F1   | 12.2±2.8                        | 68.3±7.6                             | 5.6±13.3                          | 6.4±3.1                        | 4.9±2.1                    |
|        |            | F2   | 7.3±3.8                         | 73.5±8.4                             | 5.4±6.8                           | 4.4±2.5                        | 7.4±1.7                    |
|        |            | F3   | 6.5±2.8                         | 66.5±6.3                             | 2.7±3.6                           | 5.8±2.4                        | 5.1±2.4                    |
|        | D2         | F4   | 6.5±2.8                         | 66.5±6.3                             | 2.7±3.6                           | 5.8±2.4                        | 5.1±2.4                    |
|        |            | F5   | 6.5±2.8                         | 66.5±6.3                             | 2.7±3.6                           | 5.8±2.4                        | 5.1±2.4                    |
|        |            | F6   | 6.5±2.8                         | 66.5±6.3                             | 2.7±3.6                           | 5.8±2.4                        | 5.1±2.4                    |

<sup>1</sup>The temperature, relative humidity, precipitation, insolation and cloud cover were averaged from a week before and after of the sampling date.

<sup>2</sup>All values are shown as mean±SD.
